# Supplementary material for: An Ensemble Docking Approach for Analyzing and Designing Aptamer Heterodimers Targeting VEGF165
Source: MDPI journal article supplement (doi:10.3390/ijms25074066), 2024-04-05
Supplement: s1 [file s1]

**Supporting Information for**

**An ensemble docking approach for analyzing and designing  
aptamer heterodimers targeting VEGF<sub>165</sub>**

Yeon Ju Go <sup>1,2</sup>, Mahroof Kalathingal <sup>1,\*</sup> and Young Min Rhee <sup>1,\*</sup>

<sup>1</sup> Department of Chemistry, Korea Advanced Institute of Science and Technology (KAIST),

Daejeon 34141, Republic of Korea

<sup>2</sup> Department of Chemistry, Pohang University of Science and Technology (POSTECH), Pohang

37673, Republic of Korea

## Supporting Figures

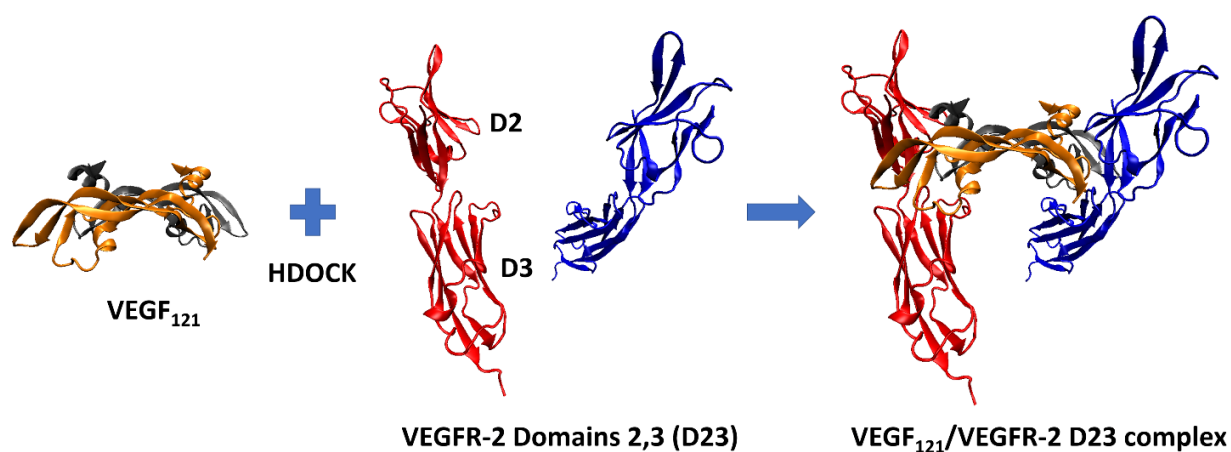

**Figure S1.** Schematic illustration of the testing process of the HDOCK performance. VEGF<sub>121</sub> and VEGFR-2 D23 were docked, and the resulting pose was cross-checked against the X-ray crystal structure of the VEGF-A/VEGFR-2 D23 complex. Indeed, they showed a good agreement. The two monomers of VEGF<sub>121</sub> are shown in orange and gray, while those of VEGFR-2 are shown in red and blue.

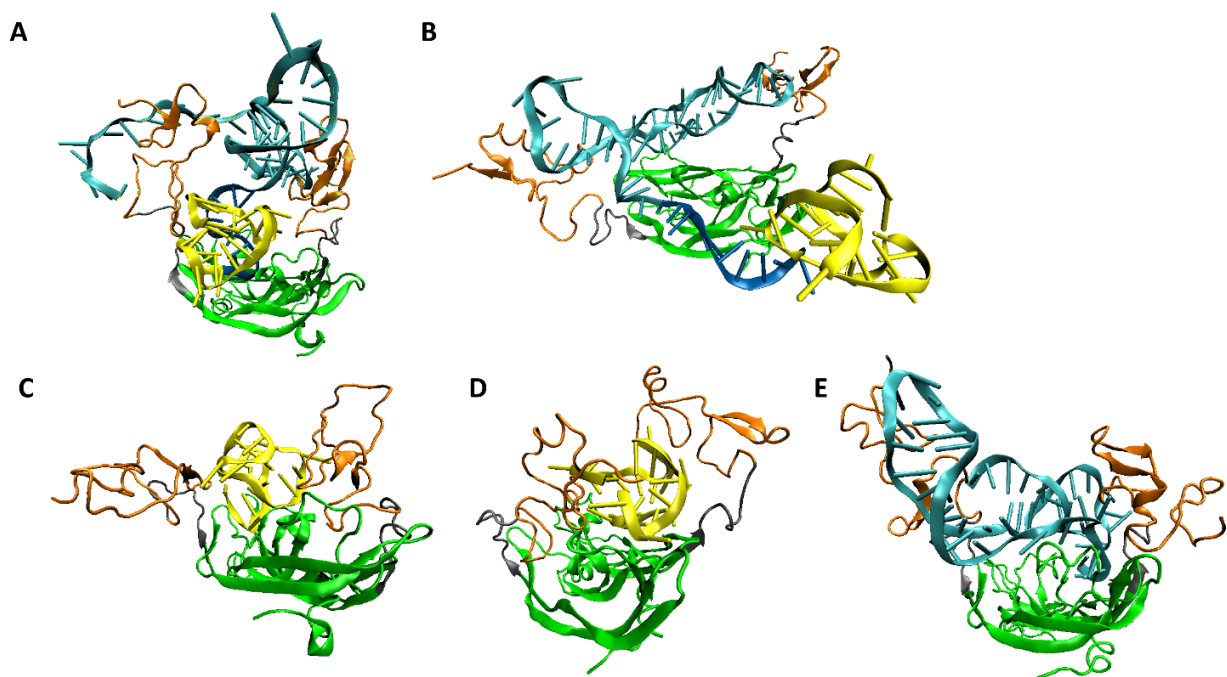

**Figure S2.** Representative structures of the sandwich poses for (A) VEGF<sub>165</sub>/RNV66:del5-1, (B) VEGF<sub>165</sub>/V7t1:del5-1, (C) VEGF<sub>165</sub>/RNV66, (D) VEGF<sub>165</sub>/V7t1, and (E) VEGF<sub>165</sub>/del5-1. For the aptamers, RNV66 and V7t1 are shown in yellow while del5-1 is in cyan, with the linker in blue. For VEGF<sub>165</sub>, RBD is in green while HBD is in orange, with the linker in gray.

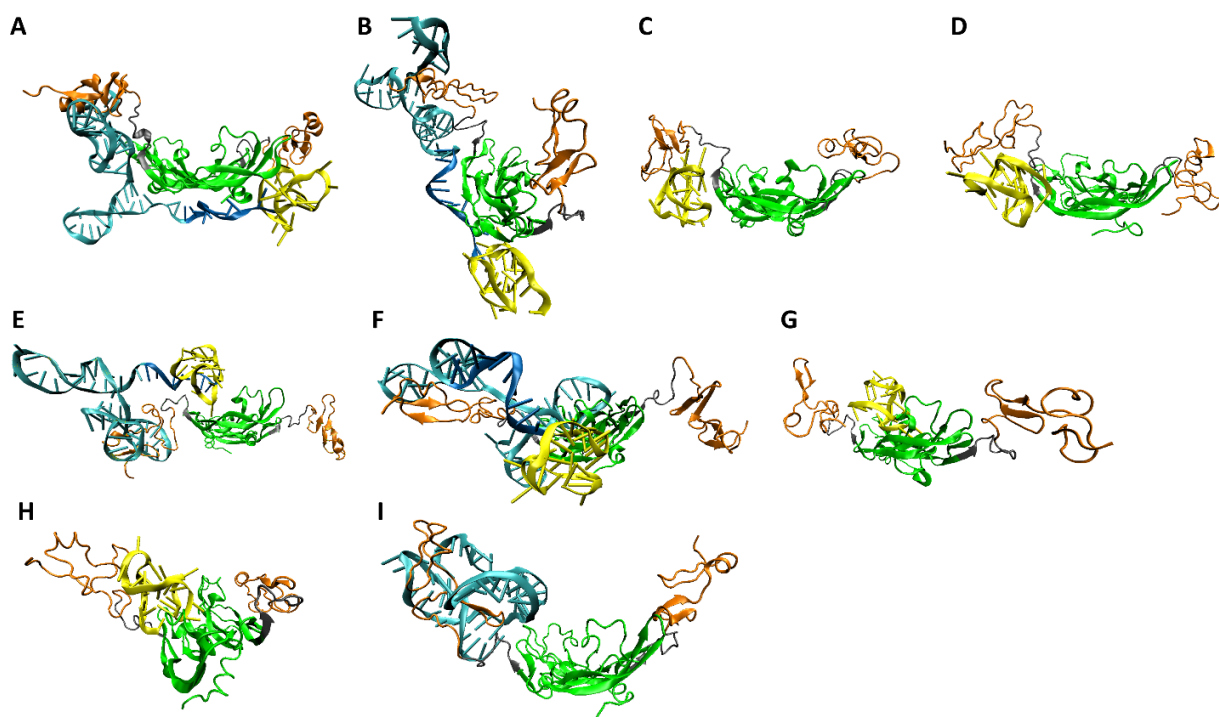

**Figure S3.** Side and hug poses of VEGF<sub>165</sub>/aptamer complexes: (A) a side pose of VEGF<sub>165</sub>/RNV66:del5-1, (B) a side pose of VEGF<sub>165</sub>/V7t1:del5-1, (C) a side pose of VEGF<sub>165</sub>/RNV66, (D) a side pose of VEGF<sub>165</sub>/V7t1, (E) a hug pose of VEGF<sub>165</sub>/RNV66:del5-1, (F) a hug pose of VEGF<sub>165</sub>/V7t1:del5-1, (G) a hug pose of VEGF<sub>165</sub>/RNV66, (H) a hug pose of VEGF<sub>165</sub>/V7t1, and (I) a hug pose of VEGF<sub>165</sub>/del5-1. No side pose was seen in the complexes of del5-1 with VEGF<sub>165</sub>. RNV66 and V7t1 are shown in yellow and del5-1 is in cyan, with the linker between them in blue. RBD is in green and HBD is in orange with the linker between them in gray.

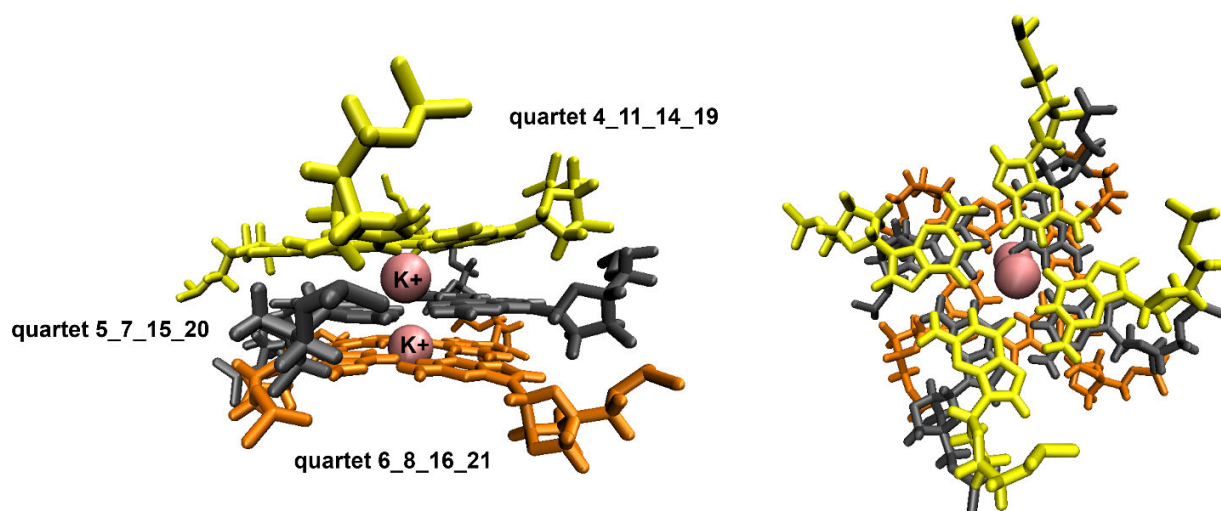

**Figure S4.** Schematic illustration of the G-quadruplex structure of RNV66. Three quartet planes are represented by 4-11-14-19 (yellow), 5-7-15-20 (gray), and 6-8-16-21 (orange), where the numbers represent the indices of guanine nucleotides forming the G-quartet plane. The right panel shows the structure viewed from the top.

## Supporting Tables

**Table S1.** Docking scores for VEGF<sub>165</sub>/RNV66:del5-1 and VEGF<sub>165</sub>/V7t1:del5-1. For each of the 84 variants composed of 12 aptamer and 7 VEGF<sub>165</sub> conformations, the pose with the highest docking score was selected.

| Pose no. | Aptamer<br>variant<br>(nm) | VEGF <sub>165</sub><br>variant<br>(nm) | Docking score (arbitrary unit)    |                                  |
|----------|----------------------------|----------------------------------------|-----------------------------------|----------------------------------|
|          |                            |                                        | VEGF <sub>165</sub> /RNV66:del5-1 | VEGF <sub>165</sub> /V7t1:del5-1 |
| 1        | 2.0                        | 3.0                                    | -1585.66                          | -1332.31                         |
| 2        | 2.0                        | 4.0                                    | -1406.98                          | -1462.43                         |
| 3        | 2.0                        | 5.0                                    | -1453.60                          | -1500.75                         |
| 4        | 2.0                        | 6.0                                    | -1661.58                          | -1414.71                         |
| 5        | 2.0                        | 7.0                                    | -1459.98                          | -1371.72                         |
| 6        | 2.0                        | 8.0                                    | -1419.21                          | -1462.75                         |
| 7        | 2.0                        | 9.0                                    | -1501.44                          | -1379.47                         |
| 8        | 2.5                        | 3.0                                    | -1376.38                          | -1332.15                         |
| 9        | 2.5                        | 4.0                                    | -1340.17                          | -1314.57                         |
| 10       | 2.5                        | 5.0                                    | -1394.24                          | -1441.49                         |
| 11       | 2.5                        | 6.0                                    | -1418.07                          | -1459.87                         |
| 12       | 2.5                        | 7.0                                    | -1491.36                          | -1442.13                         |
| 13       | 2.5                        | 8.0                                    | -1394.94                          | -1323.66                         |
| 14       | 2.5                        | 9.0                                    | -1460.88                          | -1494.86                         |
| 15       | 3.0                        | 3.0                                    | -1533.36                          | -1358.27                         |
| 16       | 3.0                        | 4.0                                    | -1467.09                          | -1428.88                         |
| 17       | 3.0                        | 5.0                                    | -1468.25                          | -1446.66                         |
| 18       | 3.0                        | 6.0                                    | -1490.43                          | -1429.68                         |
| 19       | 3.0                        | 7.0                                    | -1428.29                          | -1409.06                         |
| 20       | 3.0                        | 8.0                                    | -1483.33                          | -1438.75                         |
| 21       | 3.0                        | 9.0                                    | -1421.65                          | -1520.67                         |
| 22       | 3.5                        | 3.0                                    | -1359.34                          | -1482.53                         |
| 23       | 3.5                        | 4.0                                    | -1367.87                          | -1509.37                         |
| 24       | 3.5                        | 5.0                                    | -1411.33                          | -1484.80                         |

|    |     |     |          |          |
|----|-----|-----|----------|----------|
| 25 | 3.5 | 6.0 | -1472.44 | -1525.07 |
| 26 | 3.5 | 7.0 | -1426.56 | -1436.94 |
| 27 | 3.5 | 8.0 | -1398.79 | -1484.69 |
| 28 | 3.5 | 9.0 | -1426.25 | -1504.26 |
| 29 | 4.0 | 3.0 | -1528.69 | -1357.21 |
| 30 | 4.0 | 4.0 | -1495.14 | -1455.48 |
| 31 | 4.0 | 5.0 | -1610.47 | -1574.14 |
| 32 | 4.0 | 6.0 | -1464.47 | -1473.17 |
| 33 | 4.0 | 7.0 | -1472.31 | -1473.99 |
| 34 | 4.0 | 8.0 | -1450.83 | -1522.74 |
| 35 | 4.0 | 9.0 | -1621.94 | -1413.32 |
| 36 | 4.5 | 3.0 | -1426.16 | -1447.03 |
| 37 | 4.5 | 4.0 | -1472.15 | -1397.56 |
| 38 | 4.5 | 5.0 | -1493.81 | -1509.98 |
| 39 | 4.5 | 6.0 | -1448.33 | -1446.58 |
| 40 | 4.5 | 7.0 | -1583.54 | -1404.61 |
| 41 | 4.5 | 8.0 | -1518.56 | -1380.32 |
| 42 | 4.5 | 9.0 | -1531.82 | -1480.95 |
| 43 | 5.0 | 3.0 | -1380.37 | -1335.54 |
| 44 | 5.0 | 4.0 | -1382.32 | -1340.19 |
| 45 | 5.0 | 5.0 | -1454.60 | -1585.07 |
| 46 | 5.0 | 6.0 | -1496.28 | -1416.07 |
| 47 | 5.0 | 7.0 | -1431.18 | -1464.41 |
| 48 | 5.0 | 8.0 | -1305.42 | -1384.47 |
| 49 | 5.0 | 9.0 | -1377.28 | -1386.00 |
| 50 | 5.5 | 3.0 | -1636.68 | -1470.79 |
| 51 | 5.5 | 4.0 | -1425.01 | -1379.53 |
| 52 | 5.5 | 5.0 | -1329.79 | -1430.80 |
| 53 | 5.5 | 6.0 | -1380.04 | -1347.92 |
| 54 | 5.5 | 7.0 | -1349.97 | -1356.03 |
| 55 | 5.5 | 8.0 | -1358.41 | -1459.56 |
| 56 | 5.5 | 9.0 | -1347.19 | -1423.12 |
| 57 | 6.0 | 3.0 | -1400.87 | -1474.10 |
| 58 | 6.0 | 4.0 | -1323.23 | -1479.43 |

|    |     |     |          |          |
|----|-----|-----|----------|----------|
| 59 | 6.0 | 5.0 | -1238.59 | -1362.00 |
| 60 | 6.0 | 6.0 | -1384.32 | -1305.59 |
| 61 | 6.0 | 7.0 | -1301.92 | -1491.21 |
| 62 | 6.0 | 8.0 | -1287.77 | -1307.84 |
| 63 | 6.0 | 9.0 | -1413.63 | -1300.23 |
| 64 | 6.5 | 3.0 | -1438.00 | -1357.71 |
| 65 | 6.5 | 4.0 | -1401.28 | -1273.88 |
| 66 | 6.5 | 5.0 | -1376.03 | -1422.60 |
| 67 | 6.5 | 6.0 | -1470.37 | -1313.39 |
| 68 | 6.5 | 7.0 | -1344.00 | -1384.46 |
| 69 | 6.5 | 8.0 | -1465.69 | -1342.57 |
| 70 | 6.5 | 9.0 | -1358.48 | -1387.27 |
| 71 | 7.0 | 3.0 | -1525.94 | -1342.41 |
| 72 | 7.0 | 4.0 | -1298.53 | -1245.42 |
| 73 | 7.0 | 5.0 | -1424.56 | -1368.05 |
| 74 | 7.0 | 6.0 | -1413.82 | -1290.63 |
| 75 | 7.0 | 7.0 | -1259.39 | -1322.03 |
| 76 | 7.0 | 8.0 | -1335.68 | -1435.95 |
| 77 | 7.0 | 9.0 | -1361.75 | -1368.25 |
| 78 | 7.5 | 3.0 | -1260.05 | -1209.06 |
| 79 | 7.5 | 4.0 | -1372.79 | -1294.95 |
| 80 | 7.5 | 5.0 | -1297.33 | -1240.71 |
| 81 | 7.5 | 6.0 | -1365.60 | -1378.54 |
| 82 | 7.5 | 7.0 | -1227.52 | -1327.40 |
| 83 | 7.5 | 8.0 | -1371.70 | -1286.71 |
| 84 | 7.5 | 9.0 | -1320.48 | -1286.48 |

---



**Table S2.** Docking scores for VEGF<sub>165</sub>/RNV66, VEGF<sub>165</sub>/V7t1, and VEGF<sub>165</sub>/del5-1. For each of the 7 variants resulting from the 7 VEGF<sub>165</sub> conformations and one aptamer conformation, the top 3 poses with the highest docking scores were selected.

| Pose no. | VEGF <sub>165</sub><br>variant (nm) | Docking score (arbitrary unit) |                           |                             |
|----------|-------------------------------------|--------------------------------|---------------------------|-----------------------------|
|          |                                     | VEGF <sub>165</sub> /RNV66     | VEGF <sub>165</sub> /V7t1 | VEGF <sub>165</sub> /del5-1 |
| 1        | 3.0                                 | -1111.94                       | -1130.62                  | -1385.42                    |
| 2        | 3.0                                 | -1107.25                       | -1112.98                  | -1334.28                    |
| 3        | 3.0                                 | -1104.16                       | -1081.71                  | -1327.89                    |
| 4        | 4.0                                 | -1095.65                       | -1091.89                  | -1436.74                    |
| 5        | 4.0                                 | -1084.58                       | -1082.79                  | -1429.98                    |
| 6        | 4.0                                 | -1065.09                       | -1076.22                  | -1339.94                    |
| 7        | 5.0                                 | -1240.33                       | -1176.38                  | -1321.24                    |
| 8        | 5.0                                 | -1160.47                       | -1094.93                  | -1314.01                    |
| 9        | 5.0                                 | -1159.65                       | -1093.58                  | -1292.39                    |
| 10       | 6.0                                 | -1158.57                       | -1075.13                  | -1392.07                    |
| 11       | 6.0                                 | -1112.22                       | -1071.39                  | -1274.14                    |
| 12       | 6.0                                 | -1105.28                       | -1045.00                  | -1273.14                    |
| 13       | 7.0                                 | -1127.28                       | -1077.80                  | -1292.16                    |
| 14       | 7.0                                 | -1093.09                       | -1058.36                  | -1264.45                    |
| 15       | 7.0                                 | -1083.60                       | -1046.37                  | -1225.48                    |
| 16       | 8.0                                 | -1049.06                       | -1015.12                  | -1249.85                    |
| 17       | 8.0                                 | -1026.48                       | -994.86                   | -1198.54                    |
| 18       | 8.0                                 | -1026.01                       | -986.45                   | -1182.81                    |
| 19       | 9.0                                 | -1079.94                       | -1073.30                  | -1252.40                    |
| 20       | 9.0                                 | -999.11                        | -1071.73                  | -1223.78                    |
| 21       | 9.0                                 | -987.24                        | -1065.54                  | -1199.53                    |

**Table S3.** Binding free energy ( $\Delta G$ ) values of the top 10 complex structures for each of the five types of VEGF<sub>165</sub>/aptamer complexes.

| Complex no. | $\Delta G$ (kcal/mol)             |                                  |                            |                           |                             |
|-------------|-----------------------------------|----------------------------------|----------------------------|---------------------------|-----------------------------|
|             | VEGF <sub>165</sub> /RNV66:del5-1 | VEGF <sub>165</sub> /V7t1:del5-1 | VEGF <sub>165</sub> /RNV66 | VEGF <sub>165</sub> /V7t1 | VEGF <sub>165</sub> /del5-1 |
| 1           | −237.3                            | −237.2                           | −106.9                     | −152.4                    | −140.1                      |
| 2           | −234.8                            | −216.0                           | −86.4                      | −150.7                    | −137.6                      |
| 3           | −226.2                            | −209.0                           | −70.6                      | −120.3                    | −136.3                      |
| 4           | −218.5                            | −203.6                           | −69.6                      | −116.3                    | −133.5                      |
| 5           | −207.2                            | −199.0                           | −61.4                      | −116.3                    | −117.9                      |
| 6           | −205.8                            | −194.0                           | −59.1                      | −104.1                    | −114.2                      |
| 7           | −194.7                            | −190.4                           | −57.7                      | −90.1                     | −111.8                      |
| 8           | −194.6                            | −188.6                           | −56.0                      | −88.6                     | −109.0                      |
| 9           | −184.8                            | −188.3                           | −55.5                      | −88.1                     | −108.5                      |
| 10          | −184.6                            | −187.3                           | −55.2                      | −81.4                     | −94.0                       |
| Average     | −208.9 ± 18.6                     | −201.3 ± 15.1                    | −67.84 ± 16.0              | −110.8 ± 24.1             | −120.3 ± 14.8               |

**Table S4.** Binding poses for the top ten complex structures of each VEGF<sub>165</sub>/aptamer complex type.

| Complex no. | VEGF <sub>165</sub> /RNV66:del5-1 | VEGF <sub>165</sub> /V7t1:del5-1 | VEGF <sub>165</sub> /RNV66 | VEGF <sub>165</sub> /V7t1 | VEGF <sub>165</sub> /del5-1 |
|-------------|-----------------------------------|----------------------------------|----------------------------|---------------------------|-----------------------------|
| 1           | Sandwich                          | Sandwich                         | Sandwich                   | Hug                       | Sandwich                    |
| 2           | Sandwich                          | Sandwich                         | Side                       | Sandwich                  | Sandwich                    |
| 3           | Sandwich                          | Side                             | Hug                        | Sandwich                  | Sandwich                    |
| 4           | Sandwich                          | Sandwich                         | Sandwich                   | Side                      | Sandwich                    |
| 5           | Side                              | Sandwich                         | Sandwich                   | Sandwich                  | Sandwich                    |
| 6           | Sandwich                          | Sandwich                         | Sandwich                   | Sandwich                  | Sandwich                    |
| 7           | Sandwich                          | Sandwich                         | Sandwich                   | Sandwich                  | Sandwich                    |
| 8           | Side                              | Sandwich                         | Sandwich                   | Sandwich                  | Sandwich                    |
| 9           | Sandwich                          | Hug                              | Hug                        | Sandwich                  | Hug                         |
| 10          | Sandwich                          | Sandwich                         | Sandwich                   | Sandwich                  | Sandwich                    |
